# Supplementary material for: A Controlled Trial of Arthroscopic Surgery for Osteoarthritis of the Knee
Source: Atypon-hosted journal article supplement (doi:10.1056/nejmoa013259), 2002-07-11
Supplement: 1mose-webapp.pdf [file 1mose-webapp.pdf]

## Supplementary Appendix

This appendix has been provided by the authors to give readers additional information about their work.

Supplement to: Moseley JB, O'Malley K, Petersen NJ, et al. A Controlled Trial of Arthroscopic Surgery for Osteoarthritis of the Knee. *N Engl J Med* 2002;347:81-8.

**SUPPLEMENTARY APPENDIX 1**

KNEE-SPECIFIC PAIN SCALE.\*

| ITEM                                                                                                                                                            | RANGE OF RESPONSES | MEANING OF RESPONSES                |
|-----------------------------------------------------------------------------------------------------------------------------------------------------------------|--------------------|-------------------------------------|
| <b>Pain magnitude</b>                                                                                                                                           |                    |                                     |
| Pain intensity                                                                                                                                                  |                    |                                     |
| 1. How much pain are you currently having in your left/right knee?                                                                                              | 1–7                | Severe pain to no pain              |
| 2. At the present time (right now), how intense is your left/right knee pain?                                                                                   | 0–10               | No pain to bad as could be          |
| 3. In the past week, how intense was your worst left/right knee pain?                                                                                           | 0–10               | No pain to bad as could be          |
| 4. In the past week, on the average, how intense was your left/right knee pain?                                                                                 | 0–10               | No pain to bad as could be          |
| Pain frequency                                                                                                                                                  |                    |                                     |
| 5. On about how many days have you had knee pain in the past week in your left/right knee?                                                                      | 0–7                | No days to all days                 |
| 6. On days when you've had knee pain in the past week, how many hours were you usually in pain in your left/right knee?                                         | 0–24               | No hours to all hours               |
| 7. On about how many days in the past week have you been kept from your usual activities (work, school, housework) because of the pain in your left/right knee? | 0–7                | No days to all days                 |
| <b>Pain distastefulness</b>                                                                                                                                     |                    |                                     |
| 8. Compared to other people your age, do you rate your situation regarding pain as . . .                                                                        | 1–5                | Very poor to excellent              |
| 9. How satisfied are you with your current situation regarding pain?                                                                                            | 1–5                | Very satisfied to very dissatisfied |
| 10. How pleased are you with your current situation regarding pain?                                                                                             | 1–5                | Very displeased to very pleased     |
| 11. How much of a problem do you have with pain because of your left/right knee?                                                                                | 1–6                | None to very severe                 |
| 12. In the past week, how unpleasant or distressing was your left/right knee pain?                                                                              | 1–10               | No pain to bad as could be          |

\*To calculate the total score, subtract the scores for items 1, 8, and 10 from the highest possible scores for those items +1 (to reverse the direction of scores, in keeping with the scores for the other items), rescale all items to a 0-to-10 scale, and add the scores for the items in each group (intensity, frequency, and distastefulness). Then average the scores for intensity and frequency to create the final pain-magnitude score, and average the sums of the pain-magnitude and pain-distastefulness scores to generate a total score. Each patient received a survey regarding his or her study knee; only the word “left” or “right” was included on each survey.

SUPPLEMENTARY APPENDIX 2

SCORES ON THE KNEE-SPECIFIC PAIN SCALE.\*

| VARIABLE                                | BEFORE PROCEDURE  | AFTER PROCEDURE      |                     |                     |                     |                     |                    |                     |
|-----------------------------------------|-------------------|----------------------|---------------------|---------------------|---------------------|---------------------|--------------------|---------------------|
|                                         |                   | 2 WK                 | 6 WK                | 3 MO                | 6 MO                | 1 YR                | 18 MO              | 2 YR                |
| Placebo group                           |                   |                      |                     |                     |                     |                     |                    |                     |
| No. with data                           | 60                | 59                   | 57                  | 56                  | 57                  | 53                  | 52                 | 55                  |
| Score                                   | 65.0±13.9         | 45.9±20.5            | 45.7±21.7           | 48.8±21.5           | 47.6±20.7           | 48.9±21.9           | 52.4±22.4          | 51.6±23.7           |
| Lavage group                            |                   |                      |                     |                     |                     |                     |                    |                     |
| No. with data                           | 61                | 59                   | 57                  | 59                  | 59                  | 57                  | 56                 | 55                  |
| Score                                   | 63.9±15.7         | 52.1±19.5            | 51.2±20.4           | 53.1±20.7           | 53.2±22.6           | 54.8±19.8           | 51.1±22.7          | 53.7±23.7           |
| Débridement group                       |                   |                      |                     |                     |                     |                     |                    |                     |
| No. with data                           | 58                | 59                   | 59                  | 58                  | 56                  | 50                  | 51                 | 53                  |
| Score                                   | 62.9±17.6         | 54.6±18.5            | 49.3±23.0           | 49.3±22.0           | 50.0±21.0           | 51.7±22.4           | 50.7±25.3          | 51.4±23.2           |
| Placebo group vs. lavage group          |                   |                      |                     |                     |                     |                     |                    |                     |
| Difference between mean scores (95% CI) | 1.0 (-4.3 to 6.4) | -6.2 (-13.5 to 1.1)  | -5.5 (-13.3 to 2.3) | -4.3 (-12.1 to 3.5) | -5.6 (-13.6 to 2.4) | -6.0 (-13.8 to 1.9) | 1.2 (-7.4 to 9.9)  | -2.1 (-11.1 to 6.9) |
| P value                                 | 0.70              | 0.09                 | 0.16                | 0.28                | 0.17                | 0.14                | 0.78               | 0.64                |
| Placebo group vs. débridement group     |                   |                      |                     |                     |                     |                     |                    |                     |
| Difference between mean scores (95% CI) | 2.0 (-3.7 to 7.8) | -8.6 (-15.8 to -1.5) | -3.6 (-11.9 to 4.6) | -0.5 (-8.6 to 7.5)  | -2.3 (-10.1 to 5.4) | -2.9 (-11.5 to 5.8) | 1.7 (-7.7 to 11.0) | 0.2 (-8.8 to 9.2)   |
| P value                                 | 0.48              | 0.02                 | 0.38                | 0.89                | 0.55                | 0.51                | 0.73               | 0.96                |

\*Scores range from 0 to 100, with higher scores indicating more severe pain. Plus-minus values are means ±SD. CI denotes confidence interval.

SCORES ON THE WALKING-BENDING SUBSCALE OF THE ARTHRITIS IMPACT MEASUREMENT SCALES.\*

| VARIABLE                                | BEFORE PROCEDURE   | AFTER PROCEDURE       |                     |                     |                     |                      |                     |                     |
|-----------------------------------------|--------------------|-----------------------|---------------------|---------------------|---------------------|----------------------|---------------------|---------------------|
|                                         |                    | 2 WK                  | 6 WK                | 3 MO                | 6 MO                | 1 YR                 | 18 MO               | 2 YR                |
| Placebo group                           |                    |                       |                     |                     |                     |                      |                     |                     |
| No. with data                           | 60                 | 59                    | 57                  | 56                  | 57                  | 54                   | 52                  | 55                  |
| Score                                   | 58.5±21.4          | 47.9±27.9             | 47.3±22.3           | 49.9±21.6           | 49.1±25.8           | 49.4±25.5            | 55.6±26.6           | 53.8±27.5           |
| Lavage group                            |                    |                       |                     |                     |                     |                      |                     |                     |
| No. with data                           | 61                 | 59                    | 57                  | 59                  | 59                  | 57                   | 57                  | 56                  |
| Score                                   | 55.5±25.0          | 57.5±26.4             | 47.2±28.8           | 47.9±30.1           | 48.7±31.6           | 49.6±29.1            | 50.5±28.5           | 51.1±28.3           |
| Débridement group                       |                    |                       |                     |                     |                     |                      |                     |                     |
| No. with data                           | 58                 | 58                    | 59                  | 58                  | 55                  | 51                   | 51                  | 53                  |
| Score                                   | 59.3±26.0          | 61.7±26.3             | 49.9±30.8           | 53.5±28.6           | 52.5±28.7           | 56.4±28.4            | 53.1±29.3           | 56.4±29.4           |
| Placebo group vs. lavage group          |                    |                       |                     |                     |                     |                      |                     |                     |
| Difference between mean scores (95% CI) | 3.1 (-5.3 to 11.4) | -9.7 (-19.5 to 0.2)   | 0.1 (-9.4 to 9.7)   | 2.0 (-7.7 to 11.7)  | 0.4 (-10.2 to 11.1) | -0.1 (-10.4 to 10.2) | 5.1 (-5.5 to 15.6)† | 2.7 (-7.8 to 13.2)† |
| P value                                 | 0.47               | 0.06                  | 0.98                | 0.68                | 0.94                | 0.98                 | 0.34                | 0.61                |
| Placebo group vs. débridement group     |                    |                       |                     |                     |                     |                      |                     |                     |
| Difference between mean scores (95% CI) | -0.8 (-9.5 to 7.9) | -13.8 (-23.7 to -3.9) | -2.6 (-12.5 to 7.3) | -3.6 (-13.0 to 5.8) | -3.4 (-13.6 to 6.8) | -7.0 (-17.4 to 3.4)  | 2.4 (-8.5 to 13.4)† | -2.6 (-13.4 to 8.2) |
| P value                                 | 0.86               | 0.007                 | 0.60                | 0.45                | 0.51                | 0.19                 | 0.66                | 0.64                |

\*Scores were transformed into scores on a scale ranging from 0 to 100, with higher scores indicating more limited function. Plus-minus values are means ±SD. CI denotes confidence interval.

†This 95 percent confidence interval includes the minimal important difference.

SCORES ON THE PAIN SUBSCALE OF THE MEDICAL OUTCOMES STUDY 36-ITEM SHORT-FORM GENERAL HEALTH SURVEY.\*

| VARIABLE                                | BEFORE PROCEDURE   | AFTER PROCEDURE    |                    |                    |                    |                     |                      |                     |
|-----------------------------------------|--------------------|--------------------|--------------------|--------------------|--------------------|---------------------|----------------------|---------------------|
|                                         |                    | 2 WK               | 6 WK               | 3 MO               | 6 MO               | 1 YR                | 18 MO                | 2 YR                |
| Placebo group                           |                    |                    |                    |                    |                    |                     |                      |                     |
| No. with data                           | 60                 | 59                 | 57                 | 56                 | 57                 | 54                  | 52                   | 55                  |
| Score                                   | 37.8±17.6          | 53.6±24.1          | 49.8±23.3          | 46.9±24.9          | 46.3±26.4          | 43.6±24.8           | 40.8±24.9            | 42.3±24.2           |
| Lavage group                            |                    |                    |                    |                    |                    |                     |                      |                     |
| No. with data                           | 61                 | 59                 | 57                 | 59                 | 59                 | 57                  | 57                   | 57                  |
| Score                                   | 37.4±15.9          | 44.7±19.7          | 45.2±21.1          | 47.1±21.1          | 46.0±22.0          | 42.8±21.2           | 44.4±24.9            | 44.4±22.4           |
| Débridement group                       |                    |                    |                    |                    |                    |                     |                      |                     |
| No. with data                           | 59                 | 59                 | 59                 | 58                 | 55                 | 51                  | 51                   | 52                  |
| Score                                   | 38.9±19.3          | 38.3±19.8          | 46.6±21.0          | 46.8±21.9          | 45.1±20.6          | 44.5±24.3           | 46.8±22.8            | 45.0±23.0           |
| Placebo group vs. lavage group          |                    |                    |                    |                    |                    |                     |                      |                     |
| Difference between mean scores (95% CI) | 0.3 (-5.7 to 6.4)  | 8.8 (0.8 to 16.9)  | 4.6 (-3.7 to 12.8) | -0.2 (-8.7 to 8.3) | 0.3 (-8.6 to 9.2)  | 0.8 (-7.9 to 9.4)   | -3.6 (-13.1 to 5.8)† | -2.1 (-10.9 to 6.6) |
| P value                                 | 0.92               | 0.03               | 0.28               | 0.97               | 0.95               | 0.86                | 0.45                 | 0.63                |
| Placebo group vs. débridement group     |                    |                    |                    |                    |                    |                     |                      |                     |
| Difference between mean scores (95% CI) | -1.1 (-7.8 to 5.6) | 15.3 (7.3 to 23.3) | 3.2 (-5.0 to 11.3) | 0.1 (-8.6 to 8.8)  | 1.2 (-7.7 to 10.0) | -1.0 (-10.5 to 8.5) | -6.1 (-15.4 to 3.3)† | -2.7 (-11.8 to 6.4) |
| P value                                 | 0.73               | <0.001             | 0.44               | 0.98               | 0.80               | 0.84                | 0.20                 | 0.56                |

\*Scores were transformed into scores on a scale ranging from 0 to 100, with higher scores indicating less pain. Plus-minus values are means ±SD. CI denotes confidence interval.

†This 95 percent confidence interval includes the minimal important difference.

SCORES ON THE PHYSICAL-FUNCTIONING SUBSCALE OF THE MEDICAL OUTCOMES STUDY 36-ITEM SHORT-FORM GENERAL HEALTH SURVEY.\*

| VARIABLE                                | BEFORE PROCEDURE   | AFTER PROCEDURE      |                    |                    |                      |                     |                      |                      |
|-----------------------------------------|--------------------|----------------------|--------------------|--------------------|----------------------|---------------------|----------------------|----------------------|
|                                         |                    | 2 WK                 | 6 WK               | 3 MO               | 6 MO                 | 1 YR                | 18 MO                | 2 YR                 |
| Placebo group                           |                    |                      |                    |                    |                      |                     |                      |                      |
| No. with data                           | 60                 | 59                   | 57                 | 56                 | 57                   | 54                  | 52                   | 54                   |
| Score                                   | 46.8±22.5          | 50.1±23.4            | 51.0±24.2          | 52.4±23.5          | 48.4±25.9            | 49.3±24.5           | 49.1±25.0            | 49.0±27.2            |
| Lavage group                            |                    |                      |                    |                    |                      |                     |                      |                      |
| No. with data                           | 61                 | 59                   | 57                 | 59                 | 59                   | 57                  | 57                   | 57                   |
| Score                                   | 44.4±22.8          | 53.6±23.3            | 51.2±26.3          | 52.9±26.7          | 53.4±27.6            | 50.0±28.0           | 47.0±28.8            | 50.9±27.3            |
| Débridement group                       |                    |                      |                    |                    |                      |                     |                      |                      |
| No. with data                           | 59                 | 59                   | 59                 | 58                 | 55                   | 50                  | 51                   | 52                   |
| Score                                   | 42.2±22.4          | 46.9±23.9            | 49.2±26.5          | 49.6±24.2          | 51.0±25.9            | 47.3±27.1           | 50.9±26.1            | 47.9±26.6            |
| Placebo group vs. lavage group          |                    |                      |                    |                    |                      |                     |                      |                      |
| Difference between mean scores (95% CI) | 2.3 (-5.8 to 10.5) | -3.6 (-12.1 to 4.9)† | -0.3 (-9.6 to 9.1) | -0.5 (-9.8 to 8.8) | -5.0 (-14.8 to 4.9)† | -0.6 (-10.5 to 9.3) | 2.1 (-8.2 to 12.4)   | -1.9 (-12.2 to 8.3)† |
| P value                                 | 0.57               | 0.41                 | 0.96               | 0.92               | 0.32                 | 0.90                | 0.68                 | 0.71                 |
| Placebo group vs. débridement group     |                    |                      |                    |                    |                      |                     |                      |                      |
| Difference between mean scores (95% CI) | 4.6 (-3.6 to 12.7) | 3.1 (-5.5 to 11.8)   | 1.8 (-7.6 to 11.2) | 2.8 (-6.0 to 11.7) | -2.6 (-12.3 to 7.1)† | 2.0 (-8.0 to 12.1)  | -1.7 (-11.7 to 8.3)† | 1.1 (-9.3 to 11.5)   |
| P value                                 | 0.27               | 0.47                 | 0.71               | 0.53               | 0.60                 | 0.69                | 0.73                 | 0.83                 |

\*Scores were transformed into scores on a scale ranging from 0 to 100, with higher scores indicating better function. Plus-minus values are means ±SD. CI denotes confidence interval.

†This 95 percent confidence interval includes the minimal important difference.
